# Supplementary material for: A facile synthesis of a copper(i) thiourea sulphate complex and its application for highly efficient chalcopyrite solar cells
Source: Royal Society of Chemistry journal article supplement (doi:10.1039/d3cc02417b), 2023-01-01
Supplement: d3cc02417b9.pdf [file d3cc02417b9.pdf]

国家教育部  
STATE EDUCATION MINISTRY  
南京大学现代分析中心  
CENTER OF MATERIALS ANALYSIS, NANJING UNIVERSITY

# 检测报告

## REPORT FOR DETECTING AND ANALYZING

|                                                                                        |                                                     |
|----------------------------------------------------------------------------------------|-----------------------------------------------------|
| 委托单位: 南京邮电大学<br>(ENTRUSTING UNIT)                                                      | 送样日期: 2022 年 2 月 22 日<br>(DATE OF SAMPLE SUPPLYING) |
| 样品名称: $\text{Cu}(\text{CH}_3\text{COO})_2\cdot\text{H}_2\text{O}$ 配合物<br>(SAMPLE NAME) | 样品状态: 白色晶体<br>(SAMPLE STATE)                        |
| 检测设备: Vario MICRO 元素分析仪<br>(INSTRUMENT)                                                | 检测项目: CHN 含量<br>(ITEMS FOR DETECTING AND ANALYZING) |
| 检测依据: JY/T 0580-2020 元素分析仪分析方法通则<br>(BASIS FOR DETECTING)                              |                                                     |

## 分析检测结果

### RESULTS OF DETECTING AND ANALYZING

| C%     | H%   | N%    |
|--------|------|-------|
| 10.42  | 3.54 | 22.59 |
| (以下空白) |      |       |

中心主任 (章)  
(DIRECTOR)

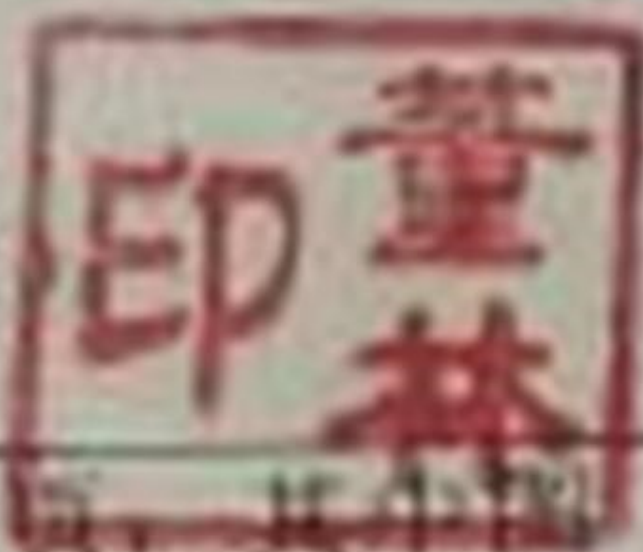

检测单位 (公章)

(DETECTING AND ANALYZING UNIT)

报告日期: 2022 年 2 月 23 日

(DATE OF REPORTING)

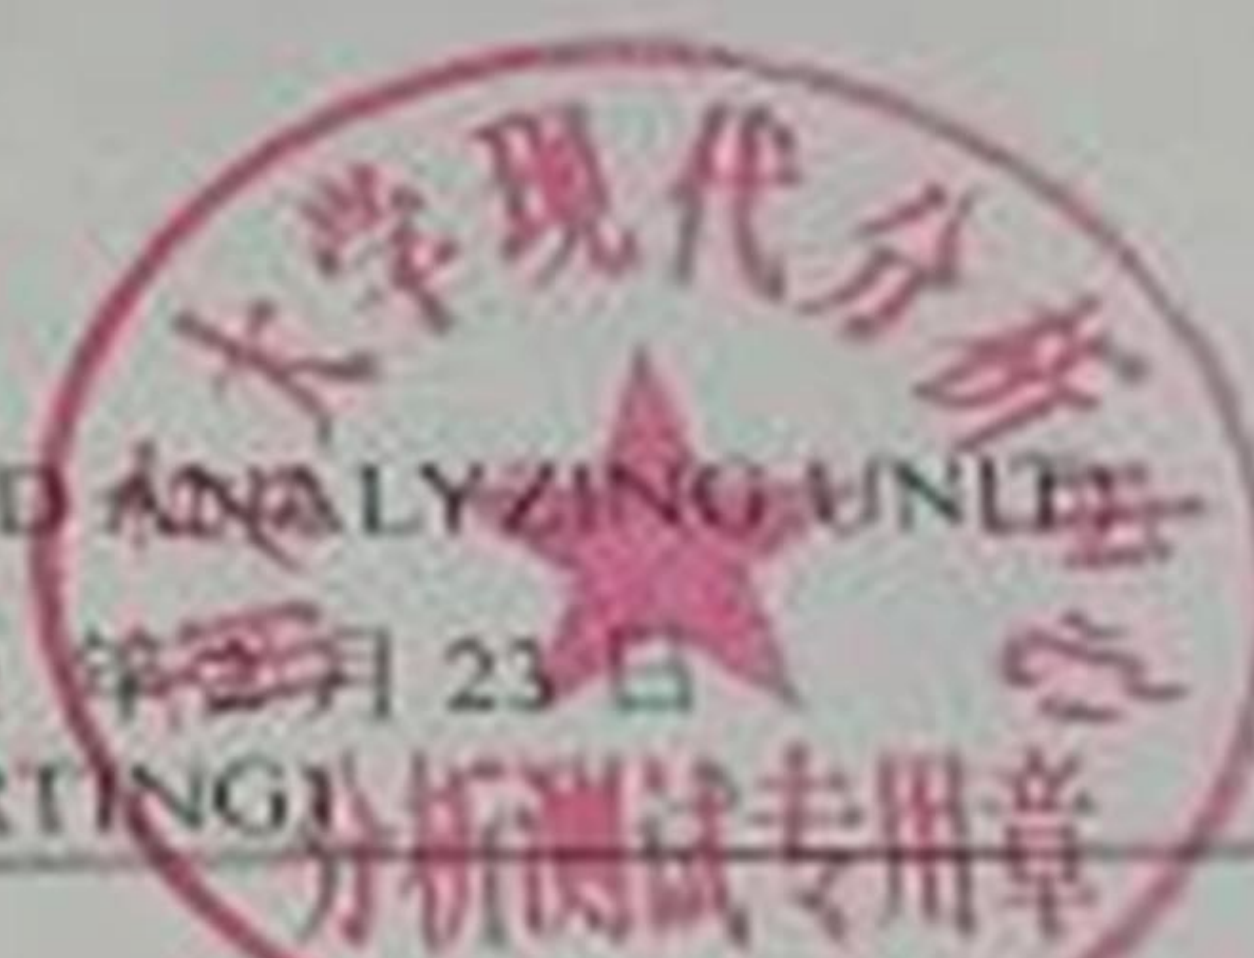

本报告共 1 页, 其中图 0 页, 表 0 页。

- 说明:
1. 本报告检测项目为普通测试, 检测数据、结果和报告不具有任何证明作用, 仅供委托方参考。
  2. 本报告涂改增删无效; 本报告不得部分复印, 本报告及其复印件未加盖本单位印章无效。
  3. 委托检验仅对样品负责, 检测结果仅反映对所检样品的评价, 检测结果的使用、使用后产生的直接或间接损失, 检测方不承担任何责任。
  4. 若对本报告有异议, 请于报告发出之日起 15 天内来本单位复检, 逾期不予受理。
  5. 未经本中心同意, 任何单位或个人不得用本报告及本中心的名义作广告宣传。

地址: 中国南京汉口路 22 号  
邮编: 210093  
电话: (025)83592318

Center of Materials Analysis, Nanjing University  
Hankou Road 22, Nanjing 210093, P.R.China  
Tel: (025)83592318
