# Supplementary figures and images for: A facile synthesis of a copper(i) thiourea sulphate complex and its application for highly efficient chalcopyrite solar cells
Source: Royal Society of Chemistry journal article supplement (doi:10.1039/d3cc02417b), 2023-01-01

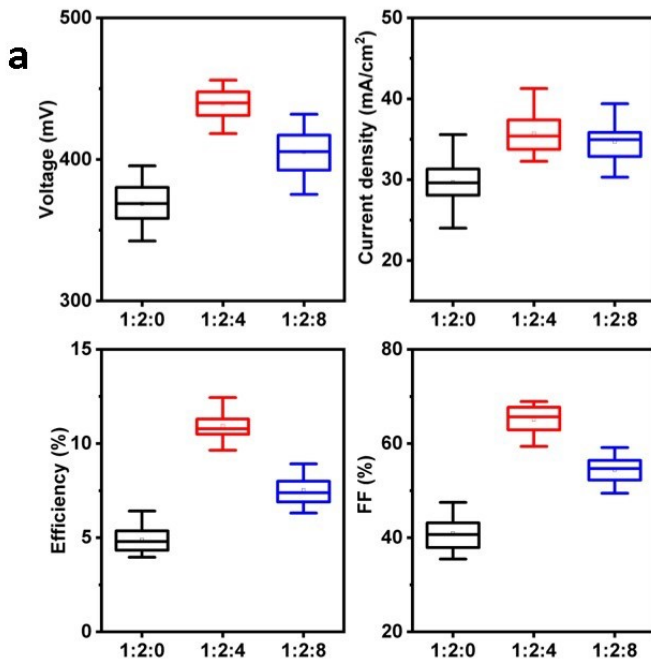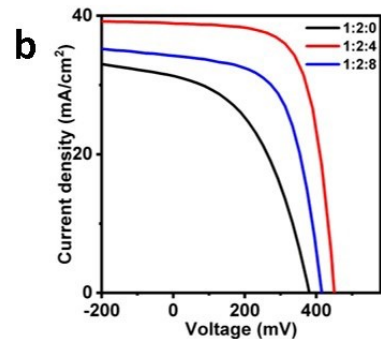

Supplement: d3cc02417b10.pdf [file d3cc02417b10.pdf]

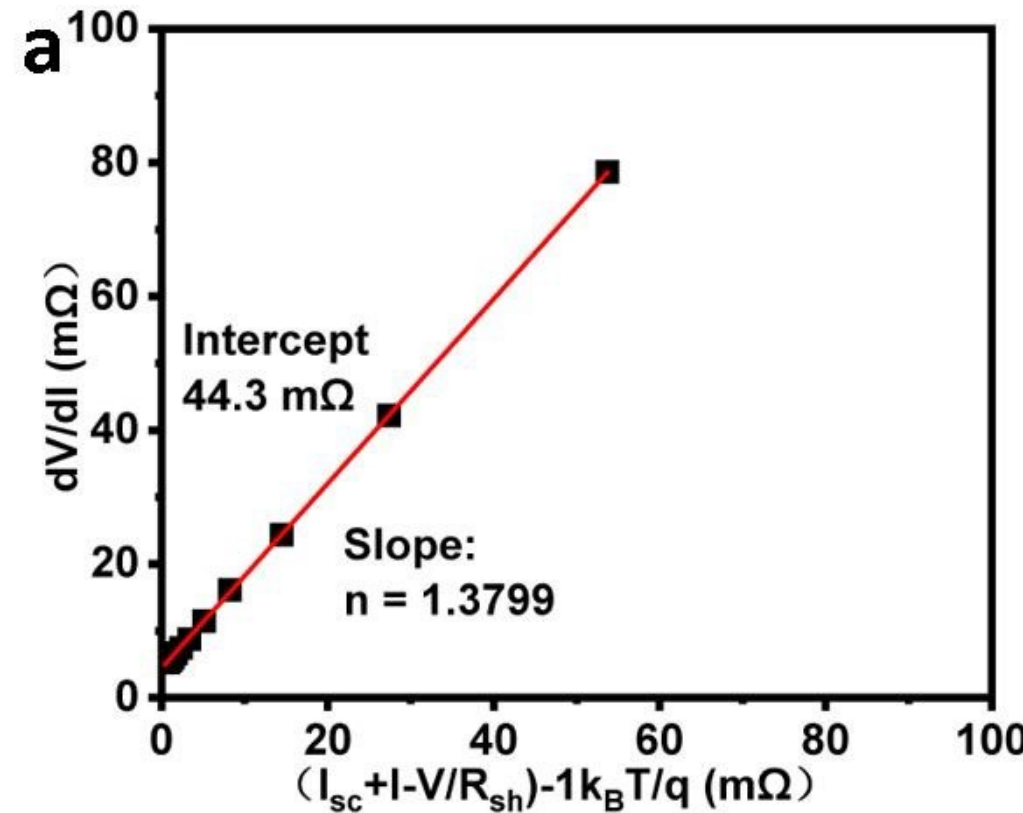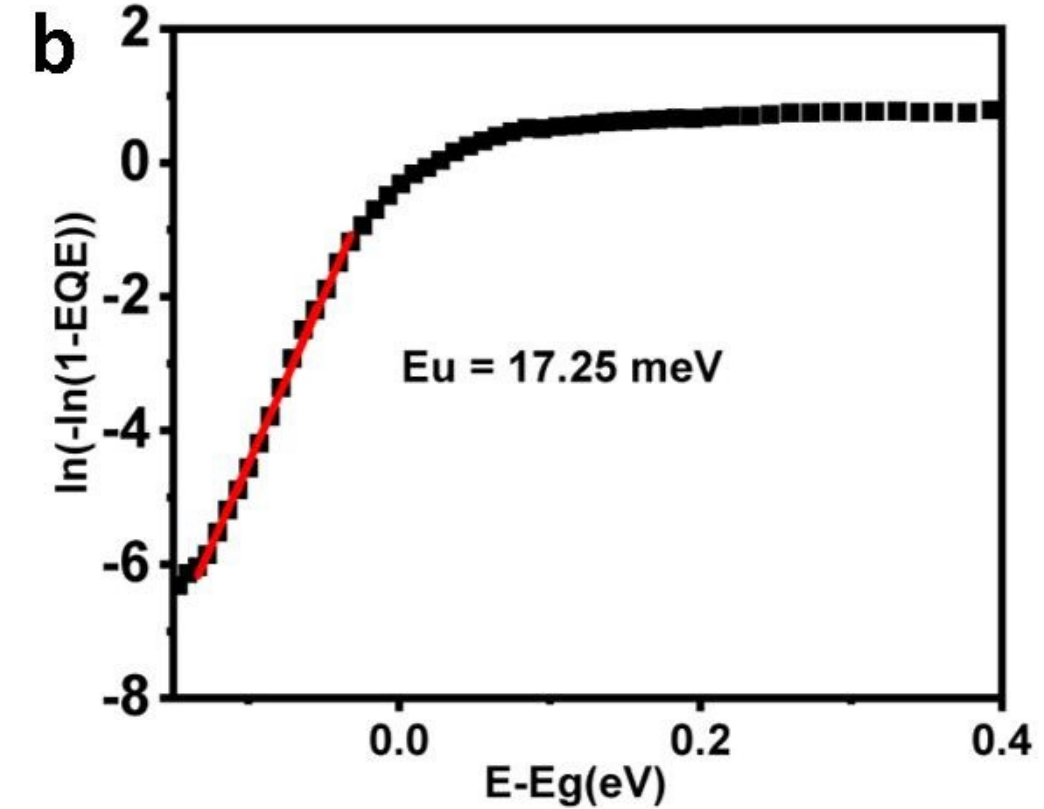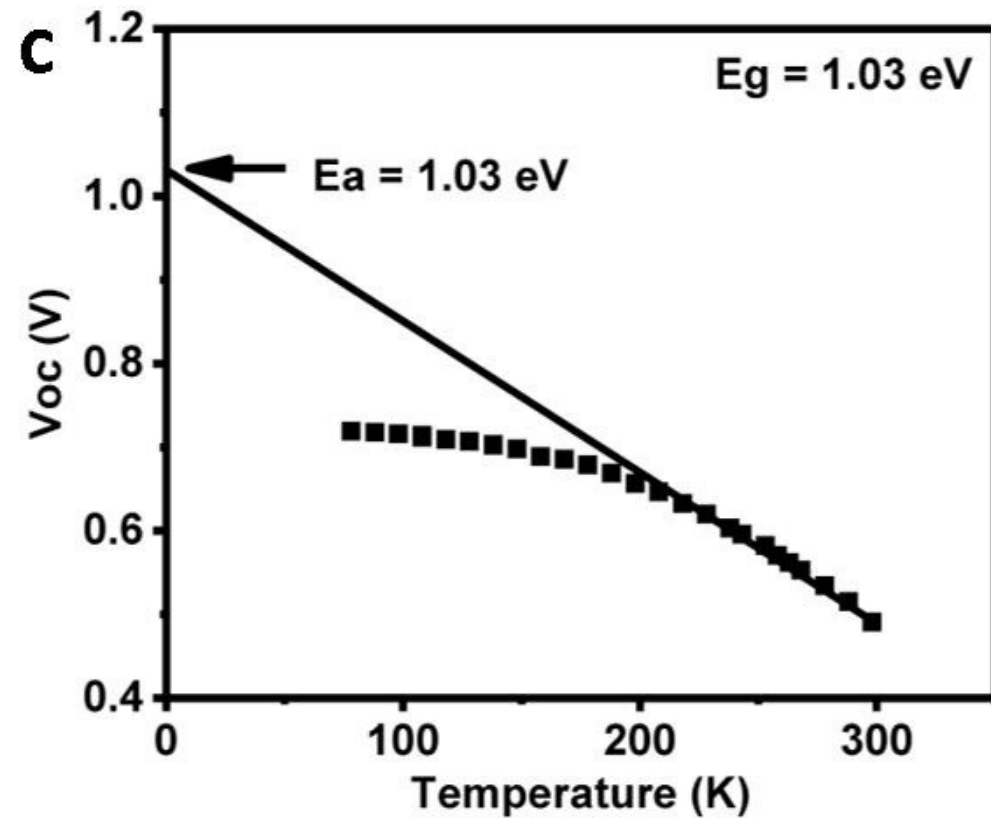

Supplement: d3cc02417b11.pdf [file d3cc02417b11.pdf]

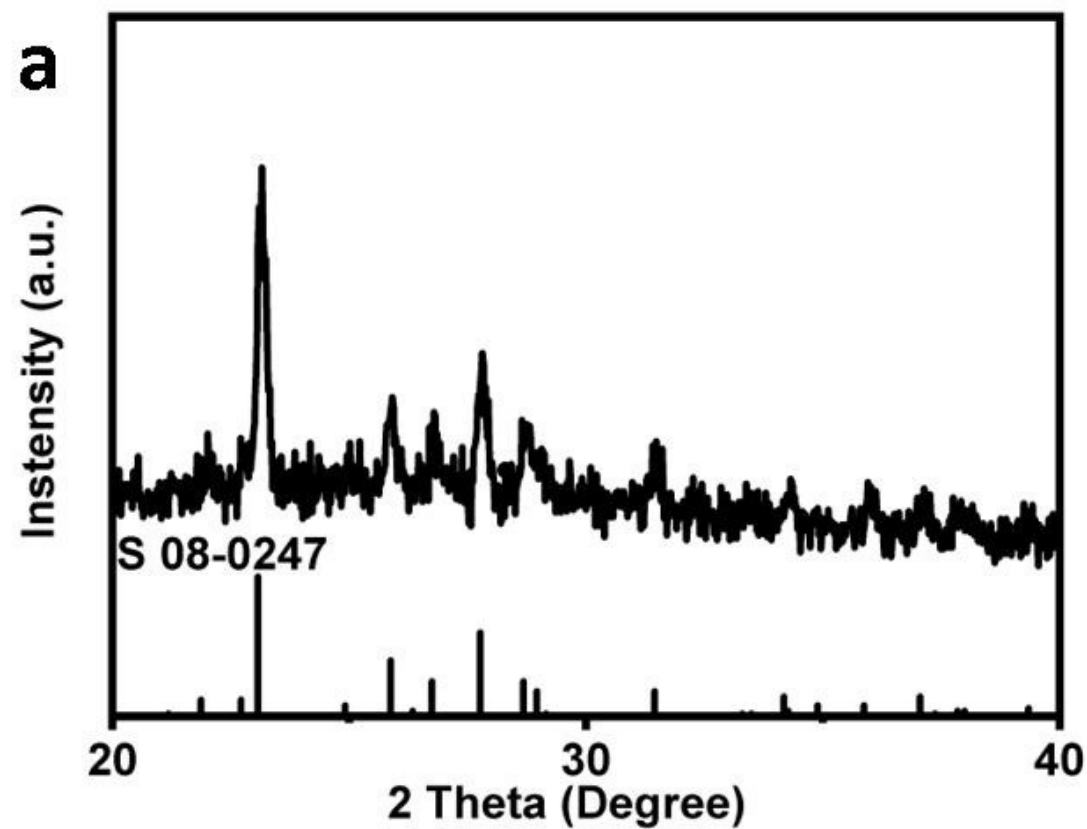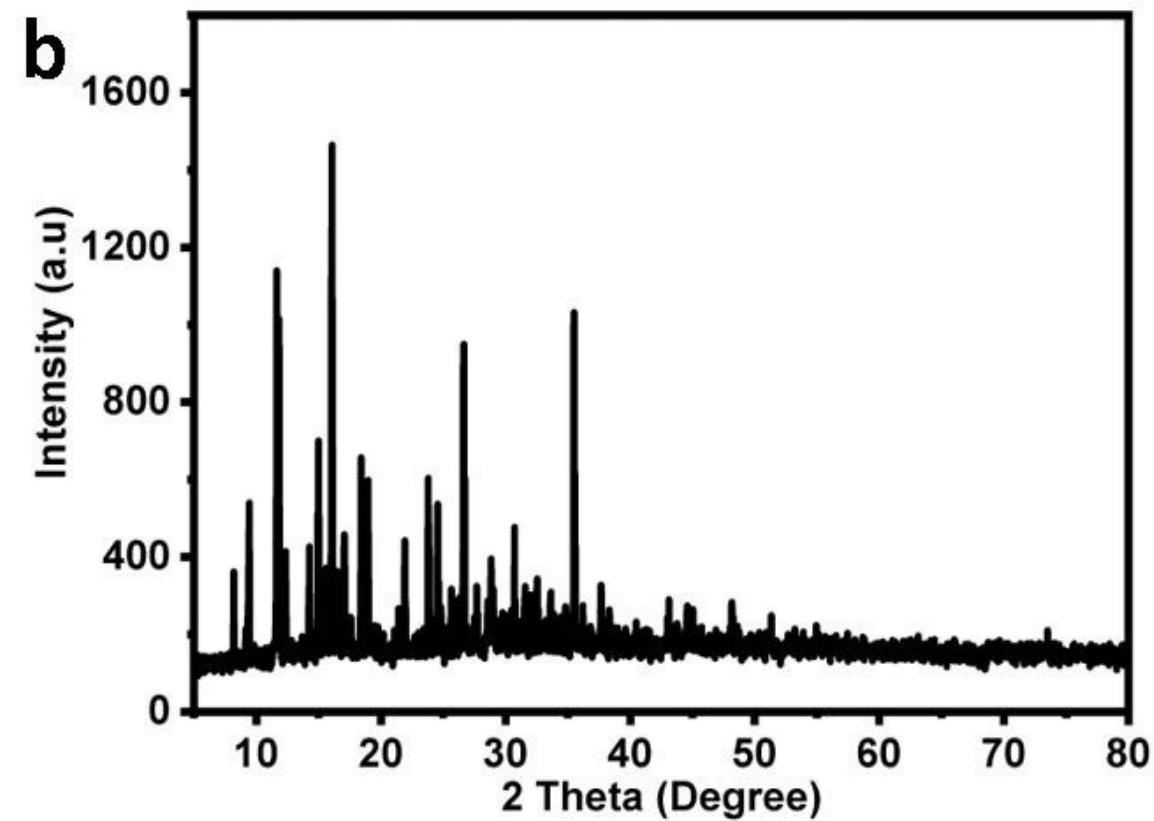

Supplement: d3cc02417b12.pdf [file d3cc02417b12.pdf]

**a**

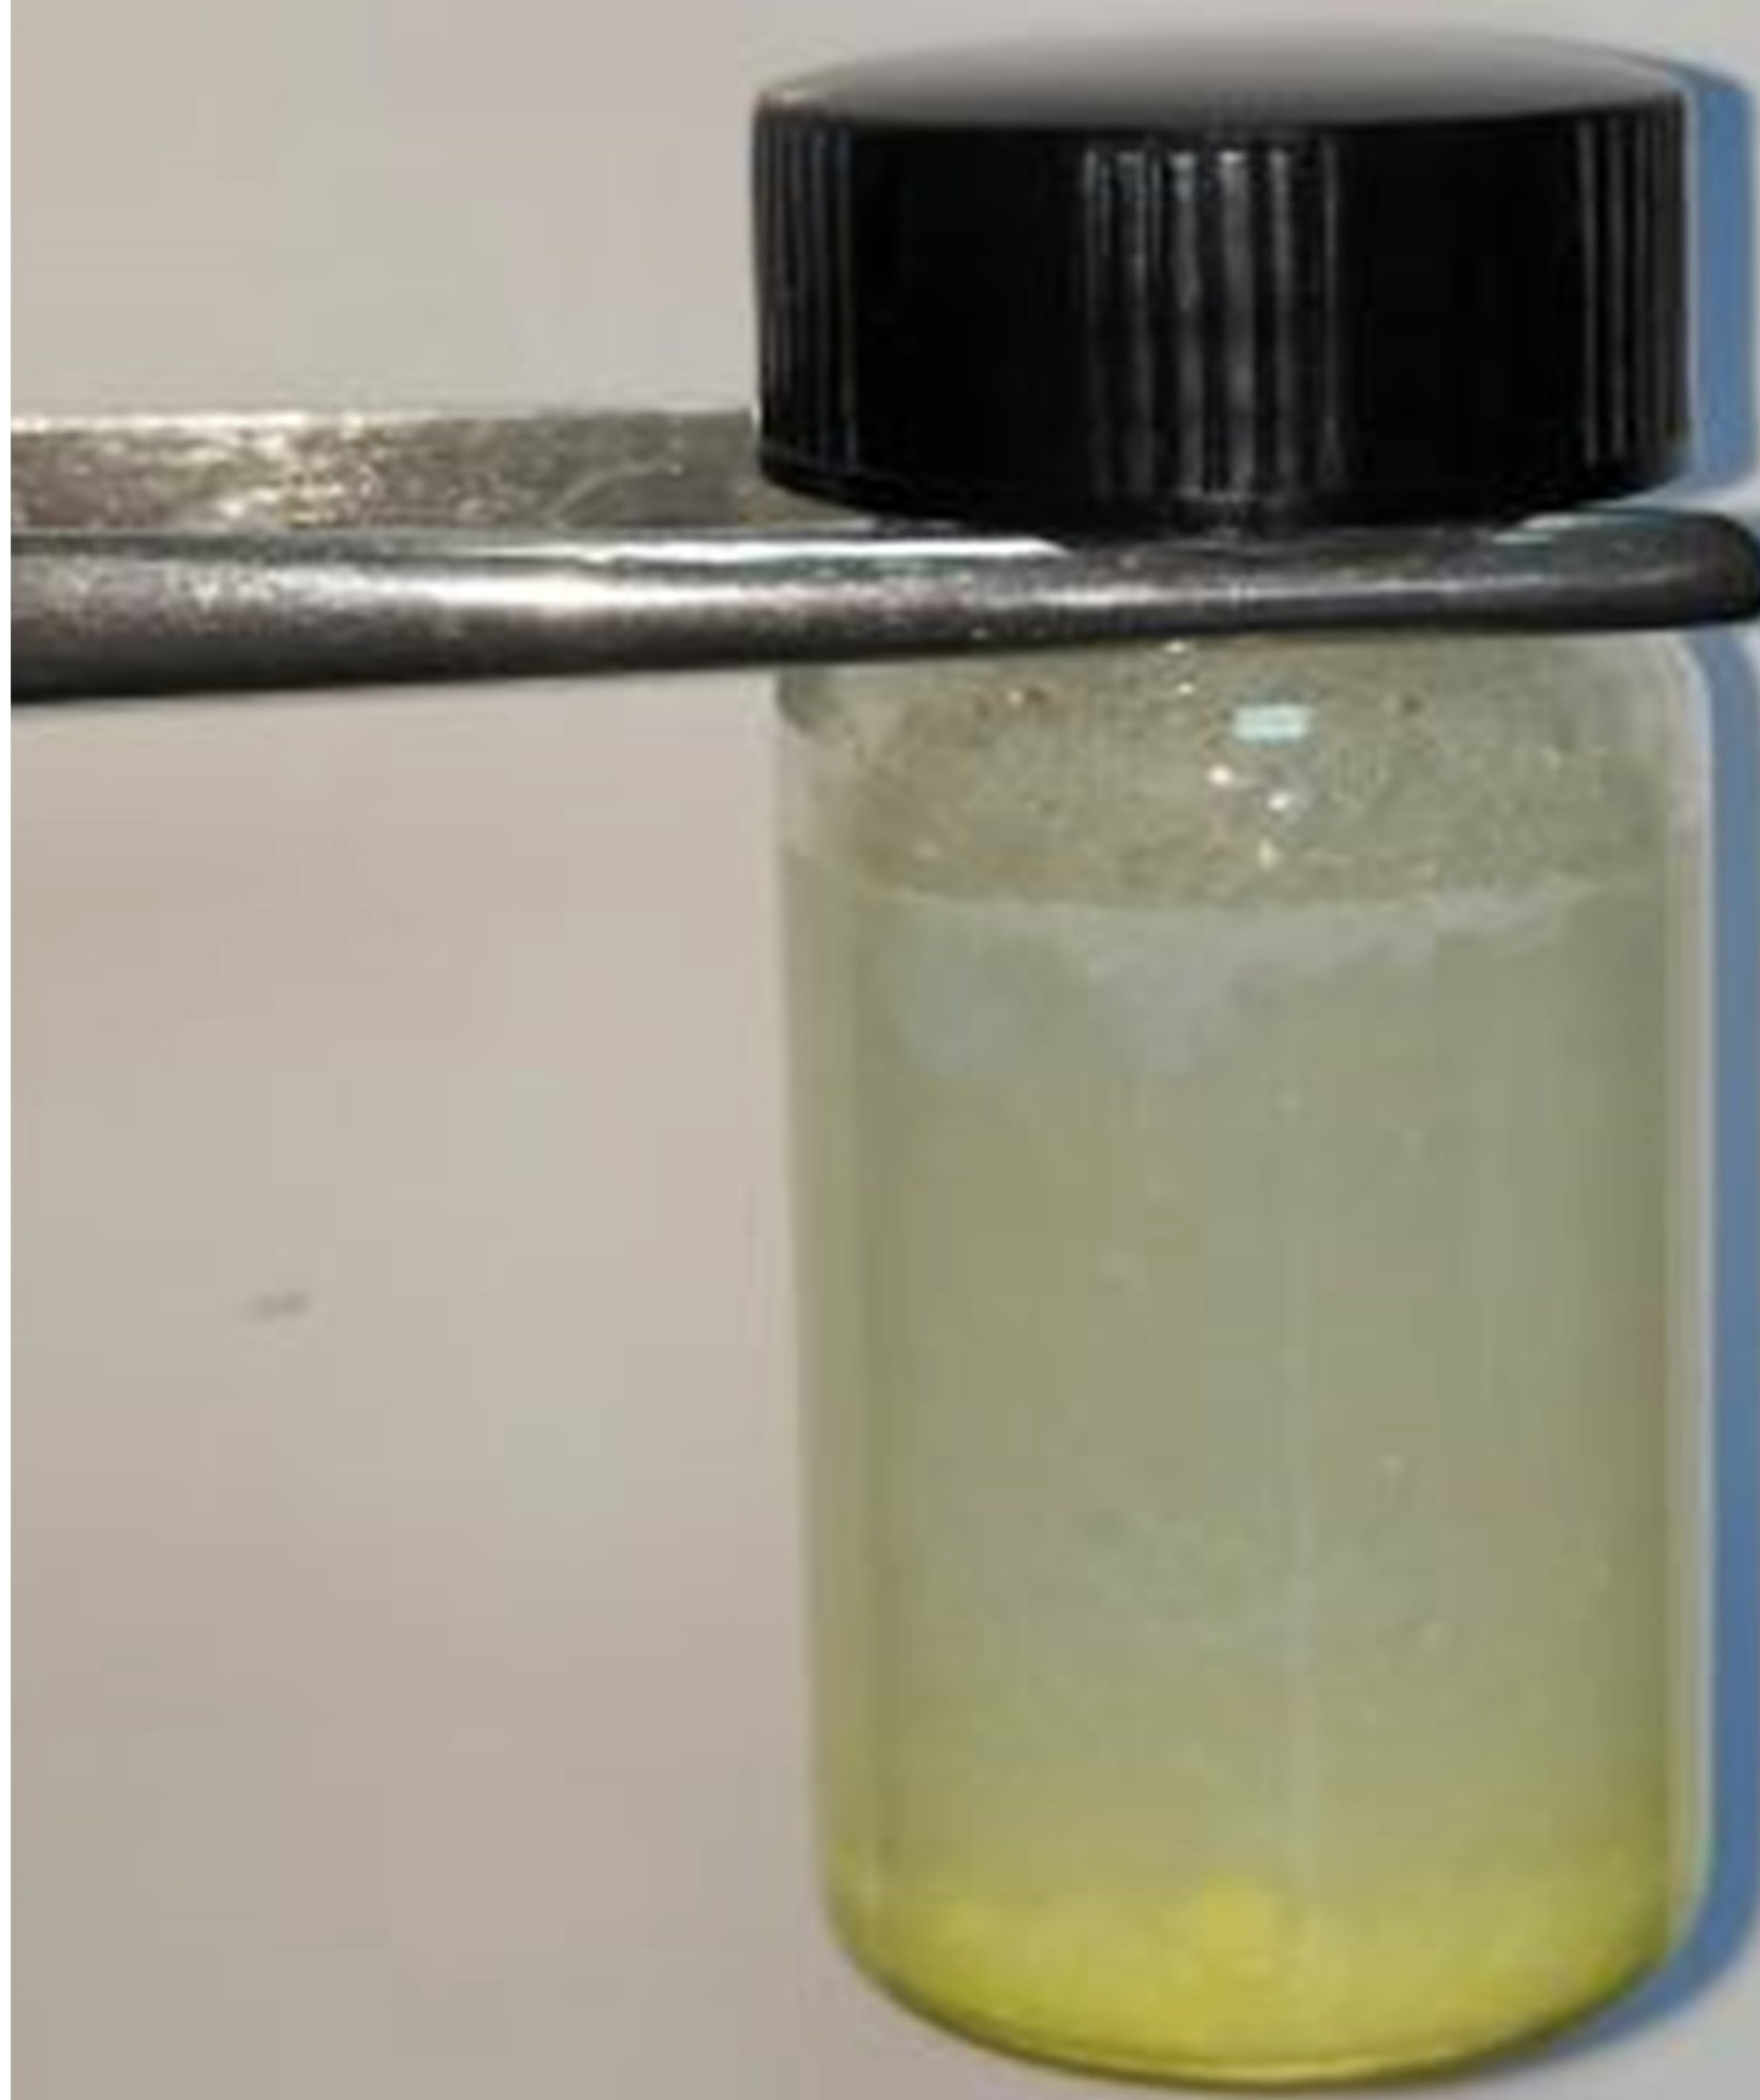

**b**

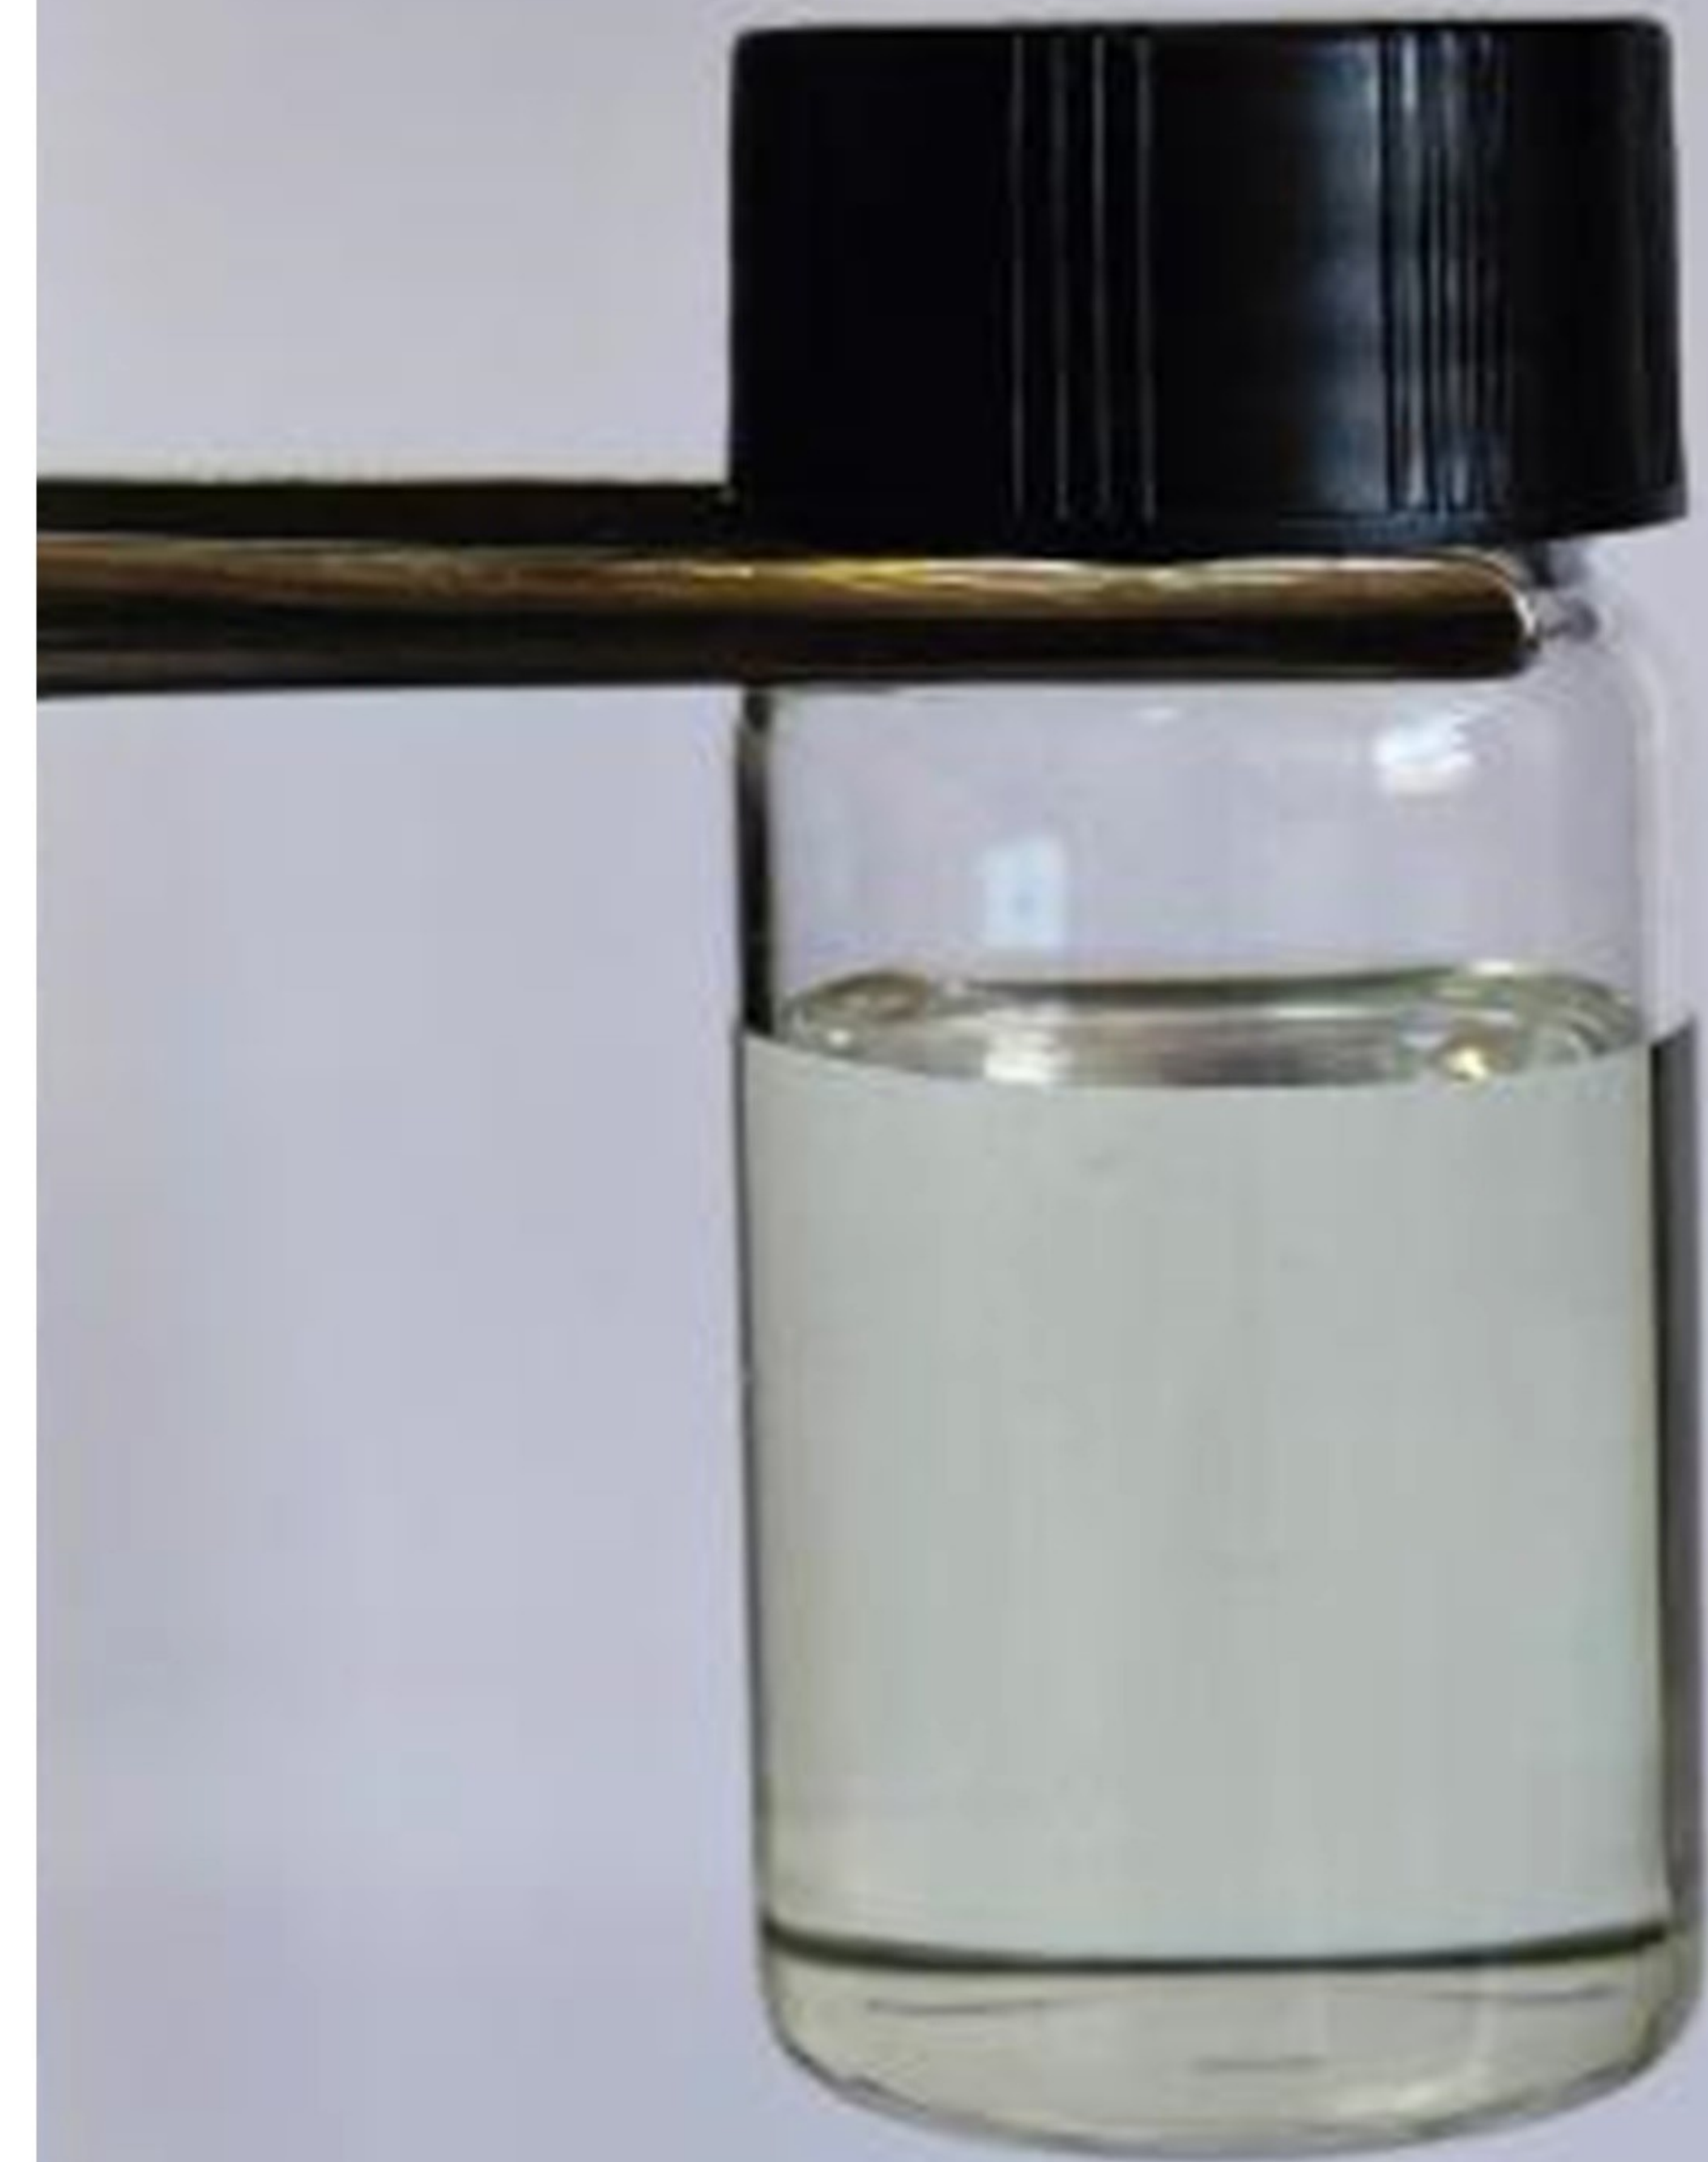

Supplement: d3cc02417b3.pdf [file d3cc02417b3.pdf]

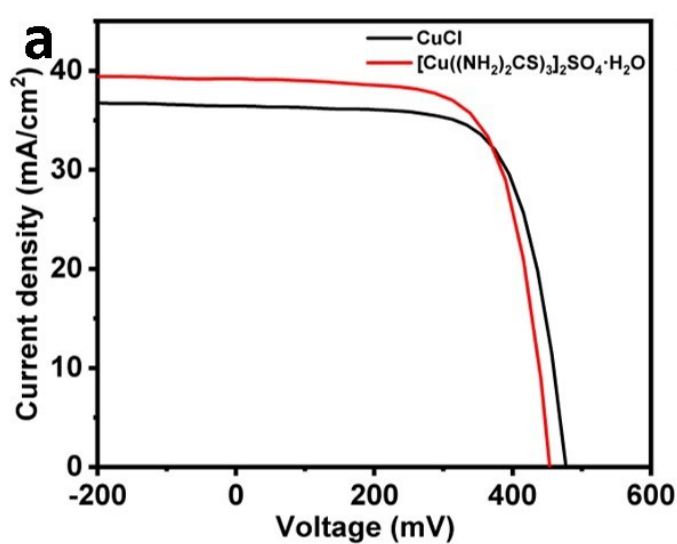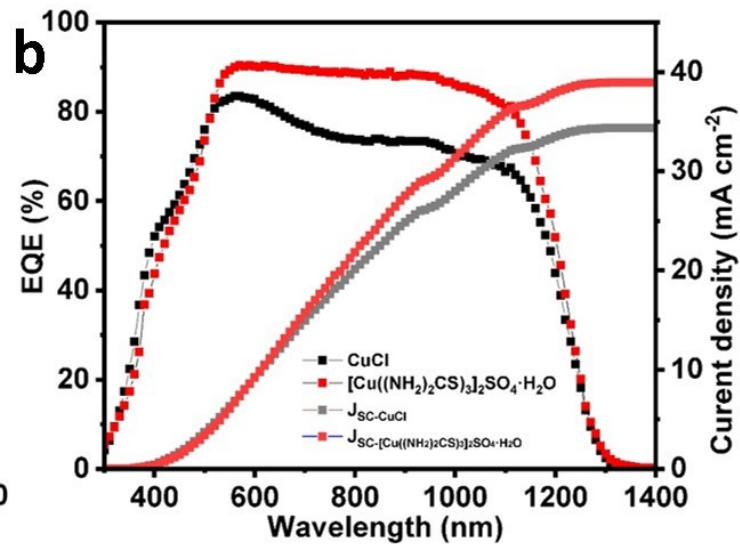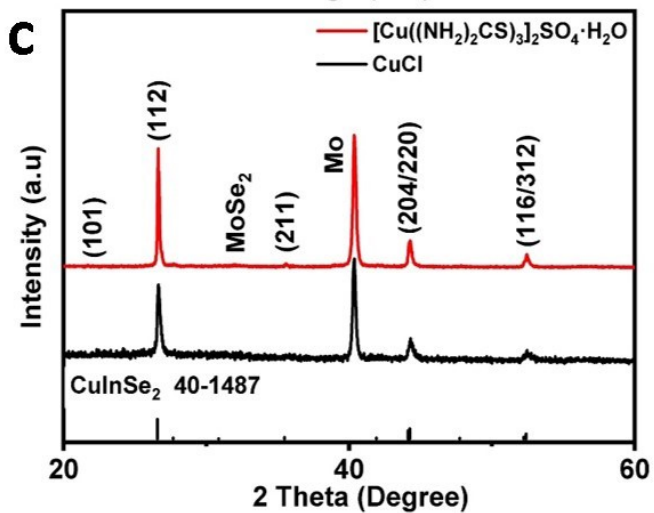

Supplement: d3cc02417b4.pdf [file d3cc02417b4.pdf]

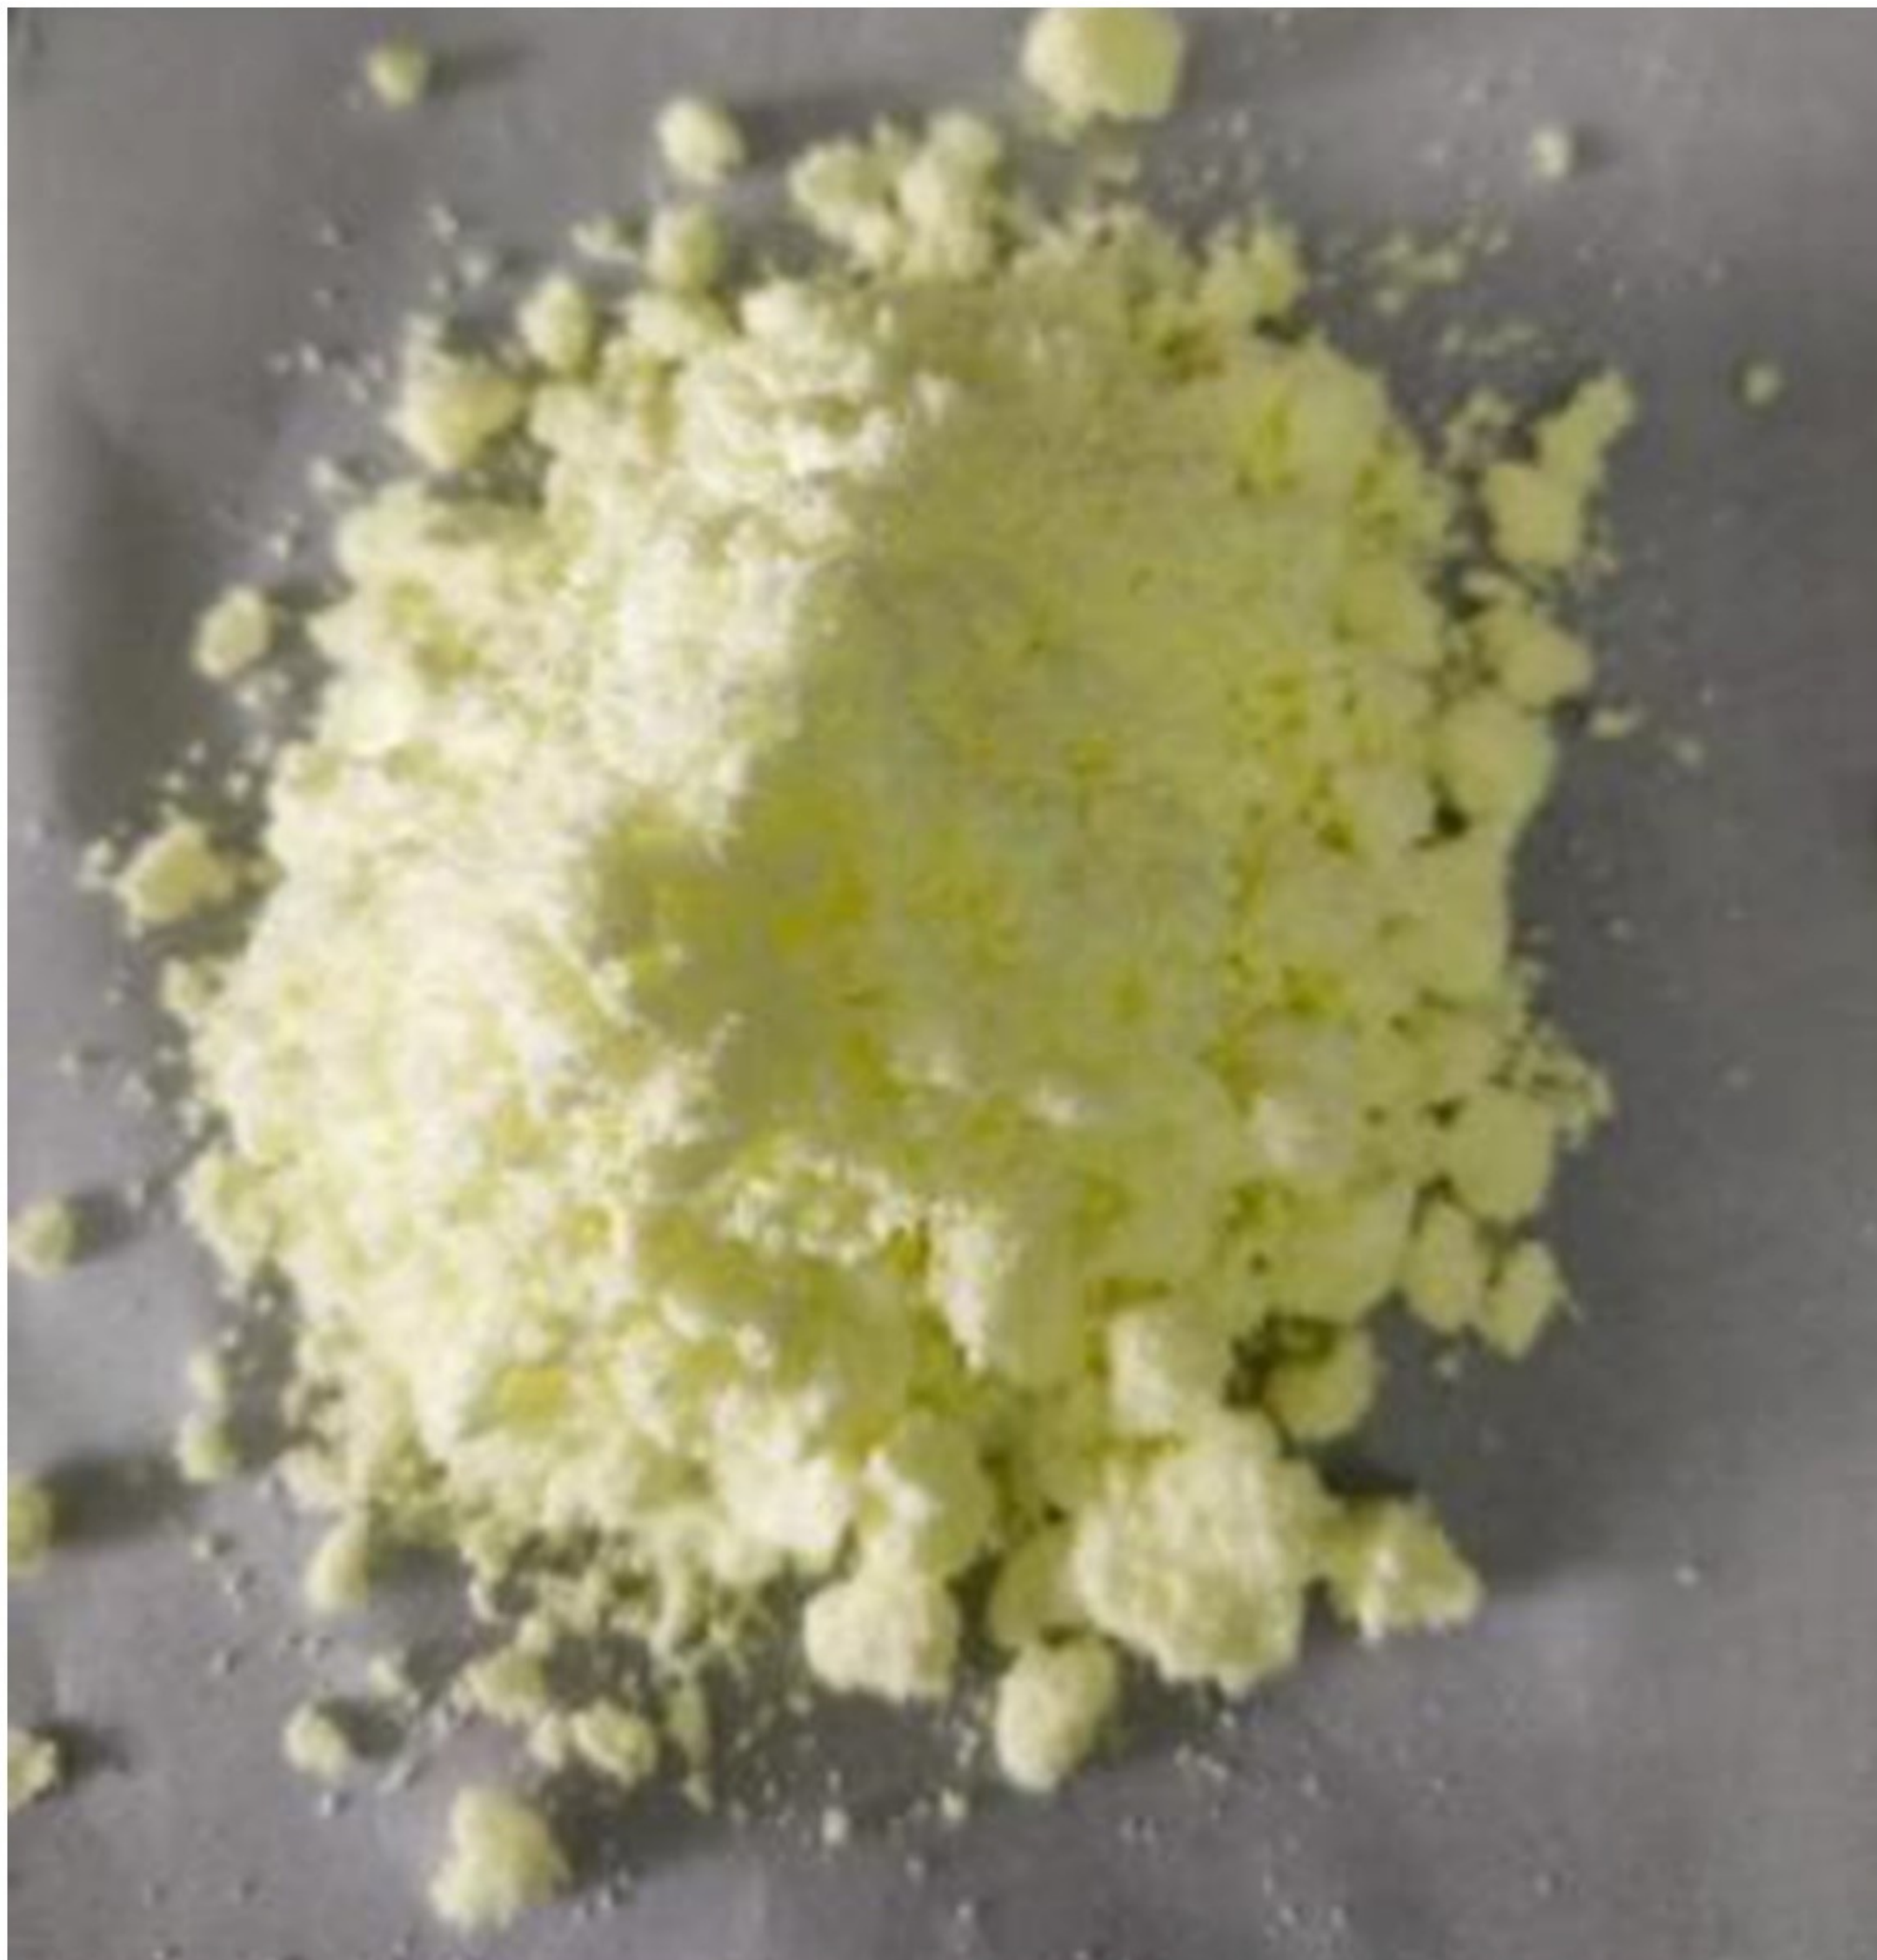

Supplement: d3cc02417b5.pdf [file d3cc02417b5.pdf]

请您在半秒后取出对照

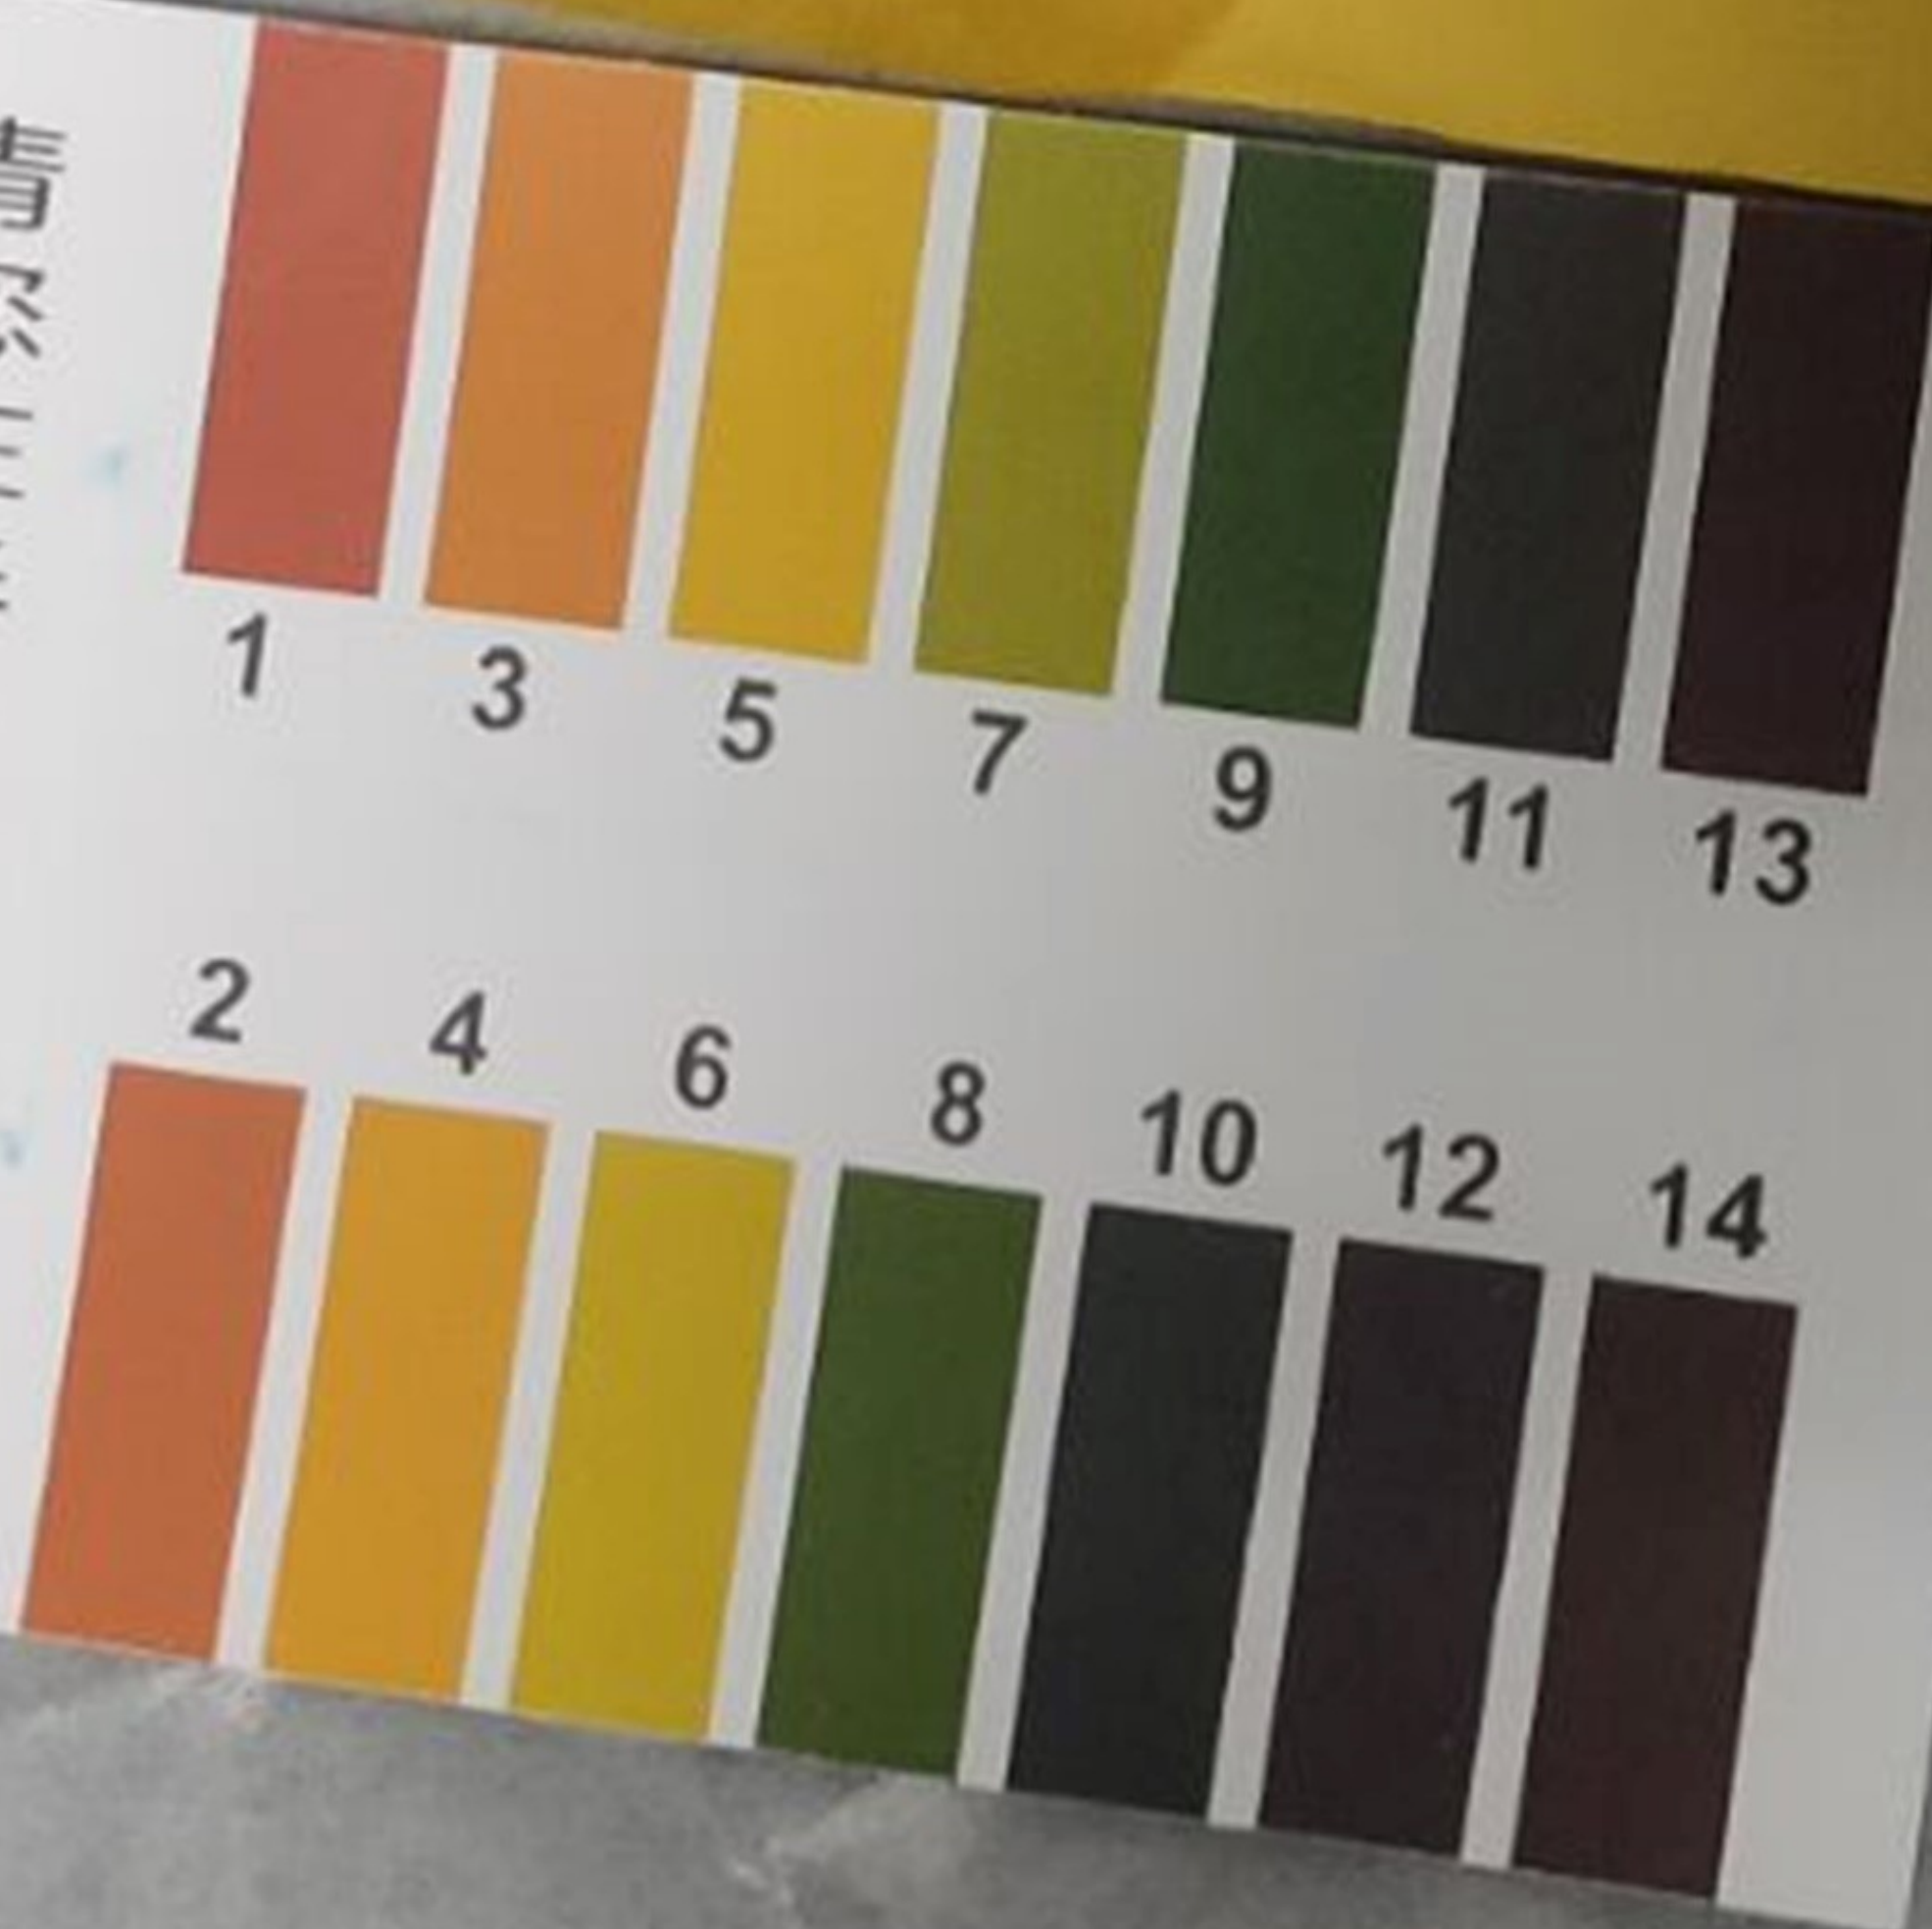

Supplement: d3cc02417b6.pdf [file d3cc02417b6.pdf]

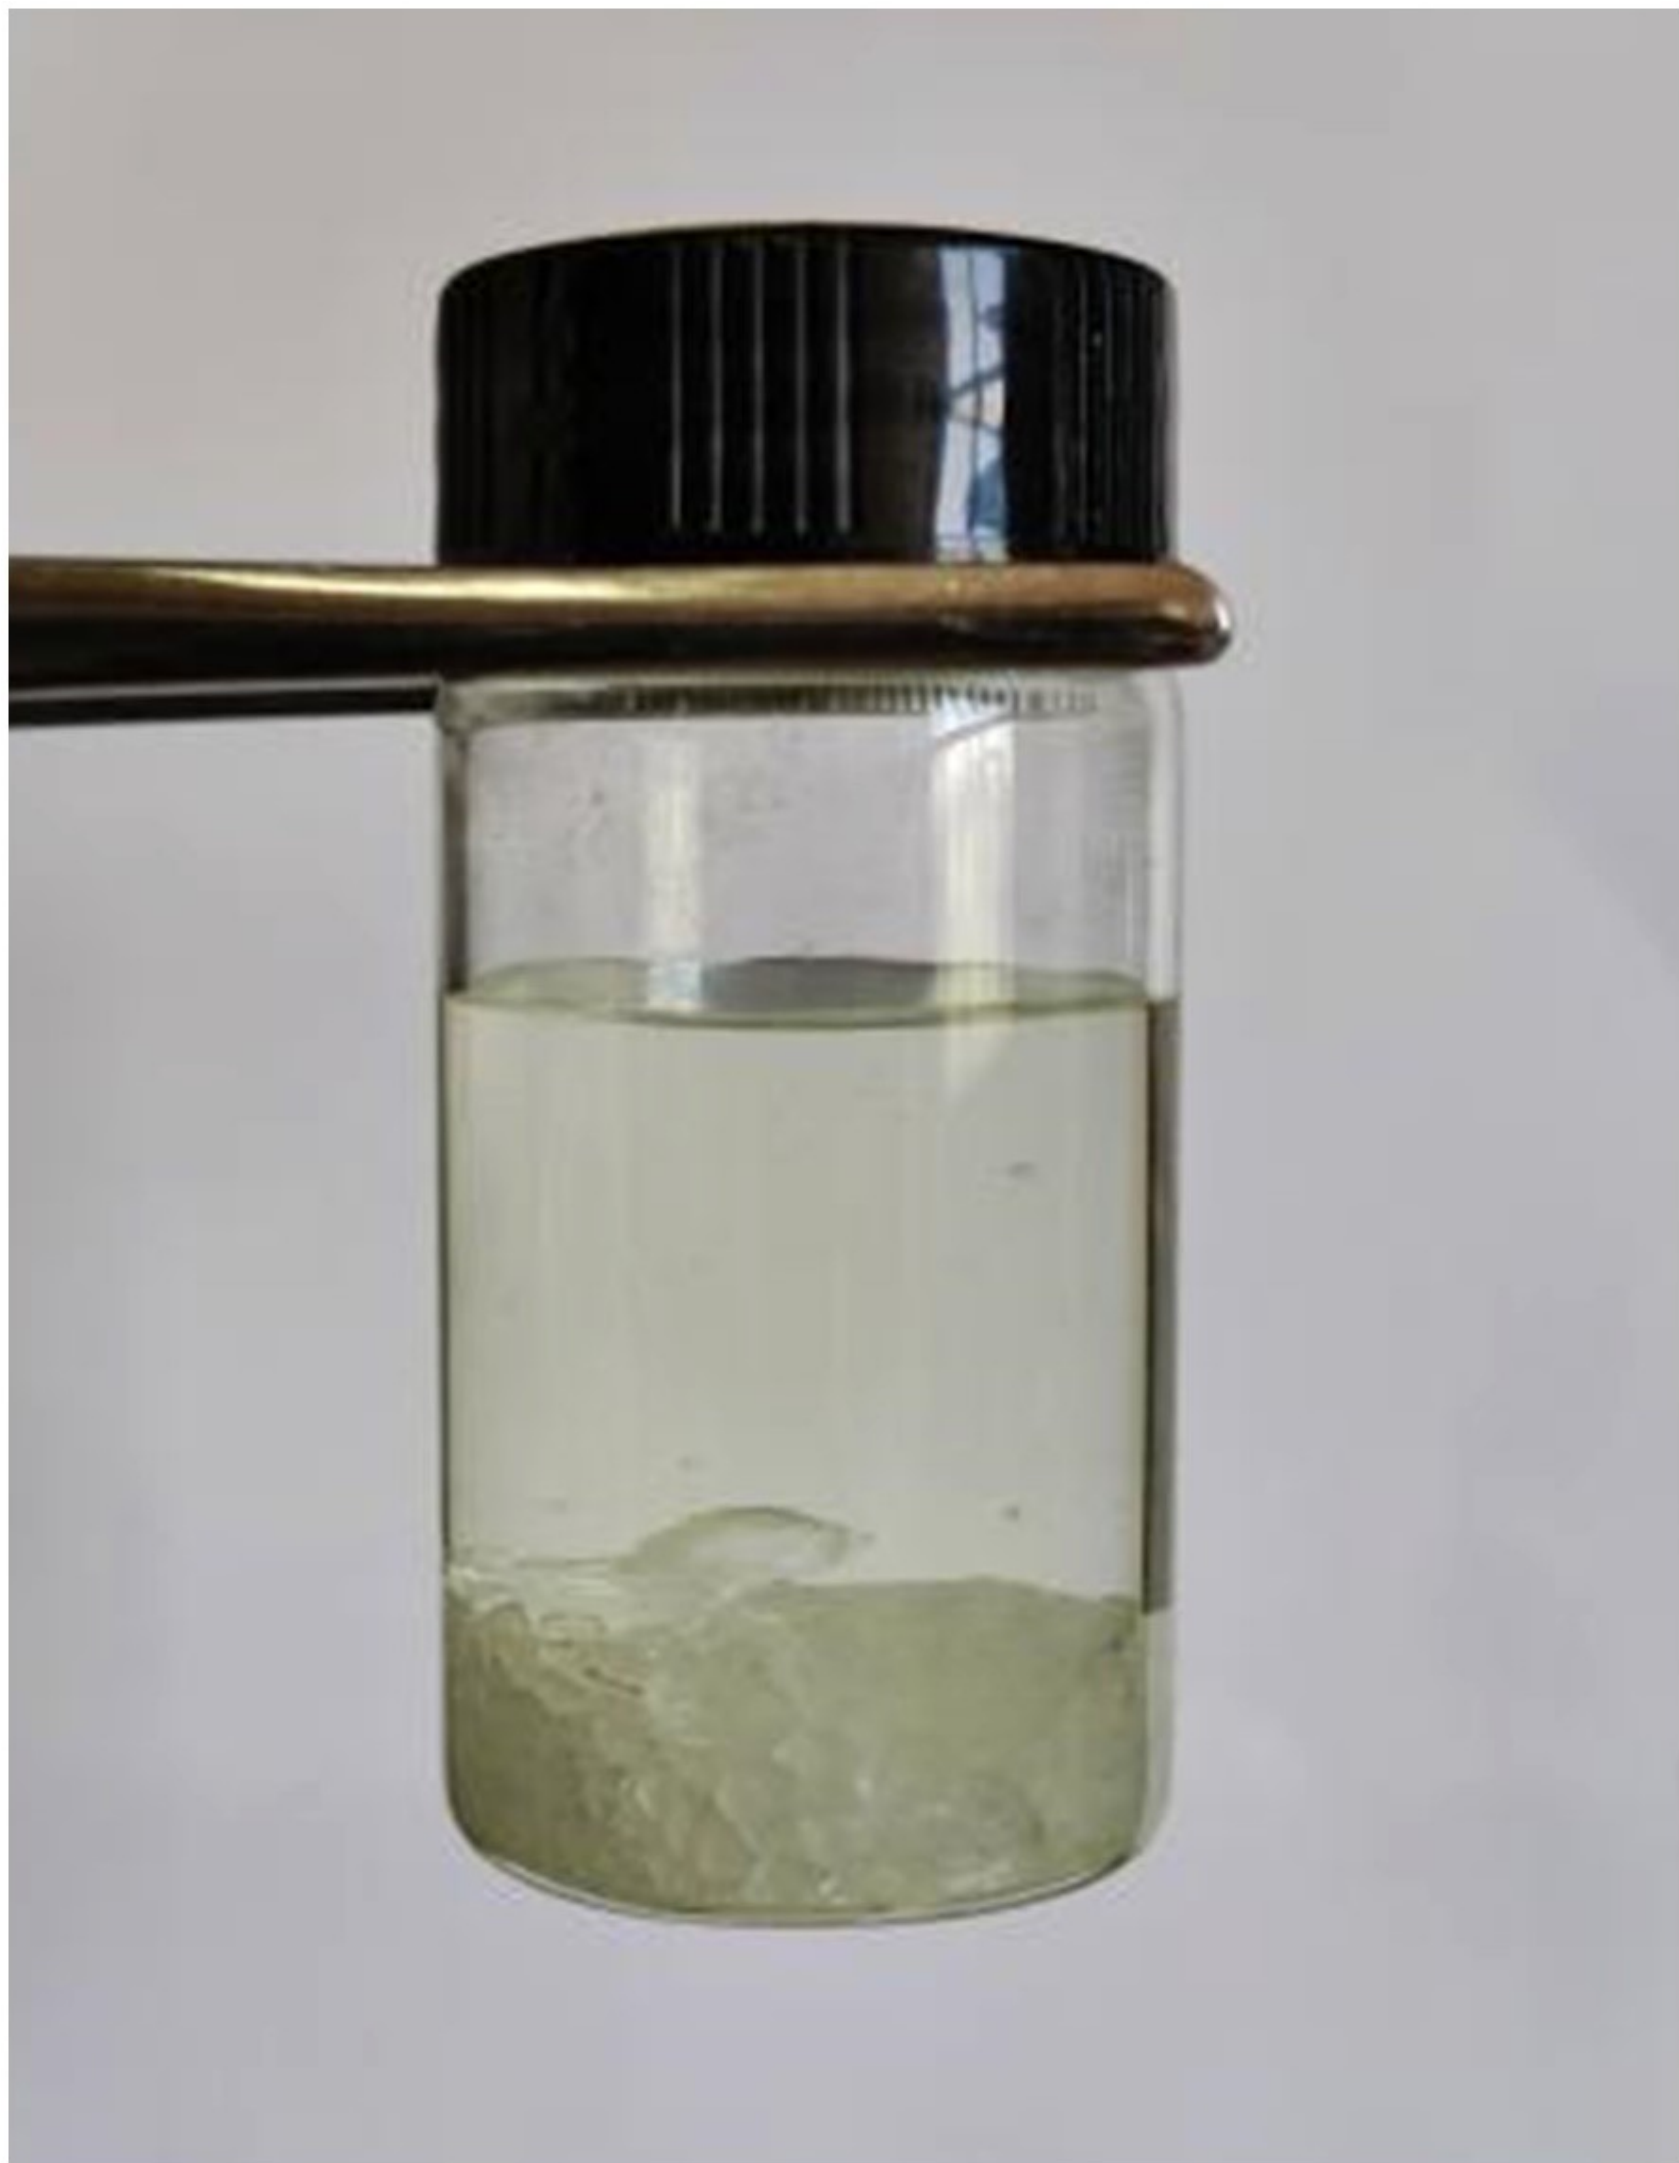

Supplement: d3cc02417b7.pdf [file d3cc02417b7.pdf]

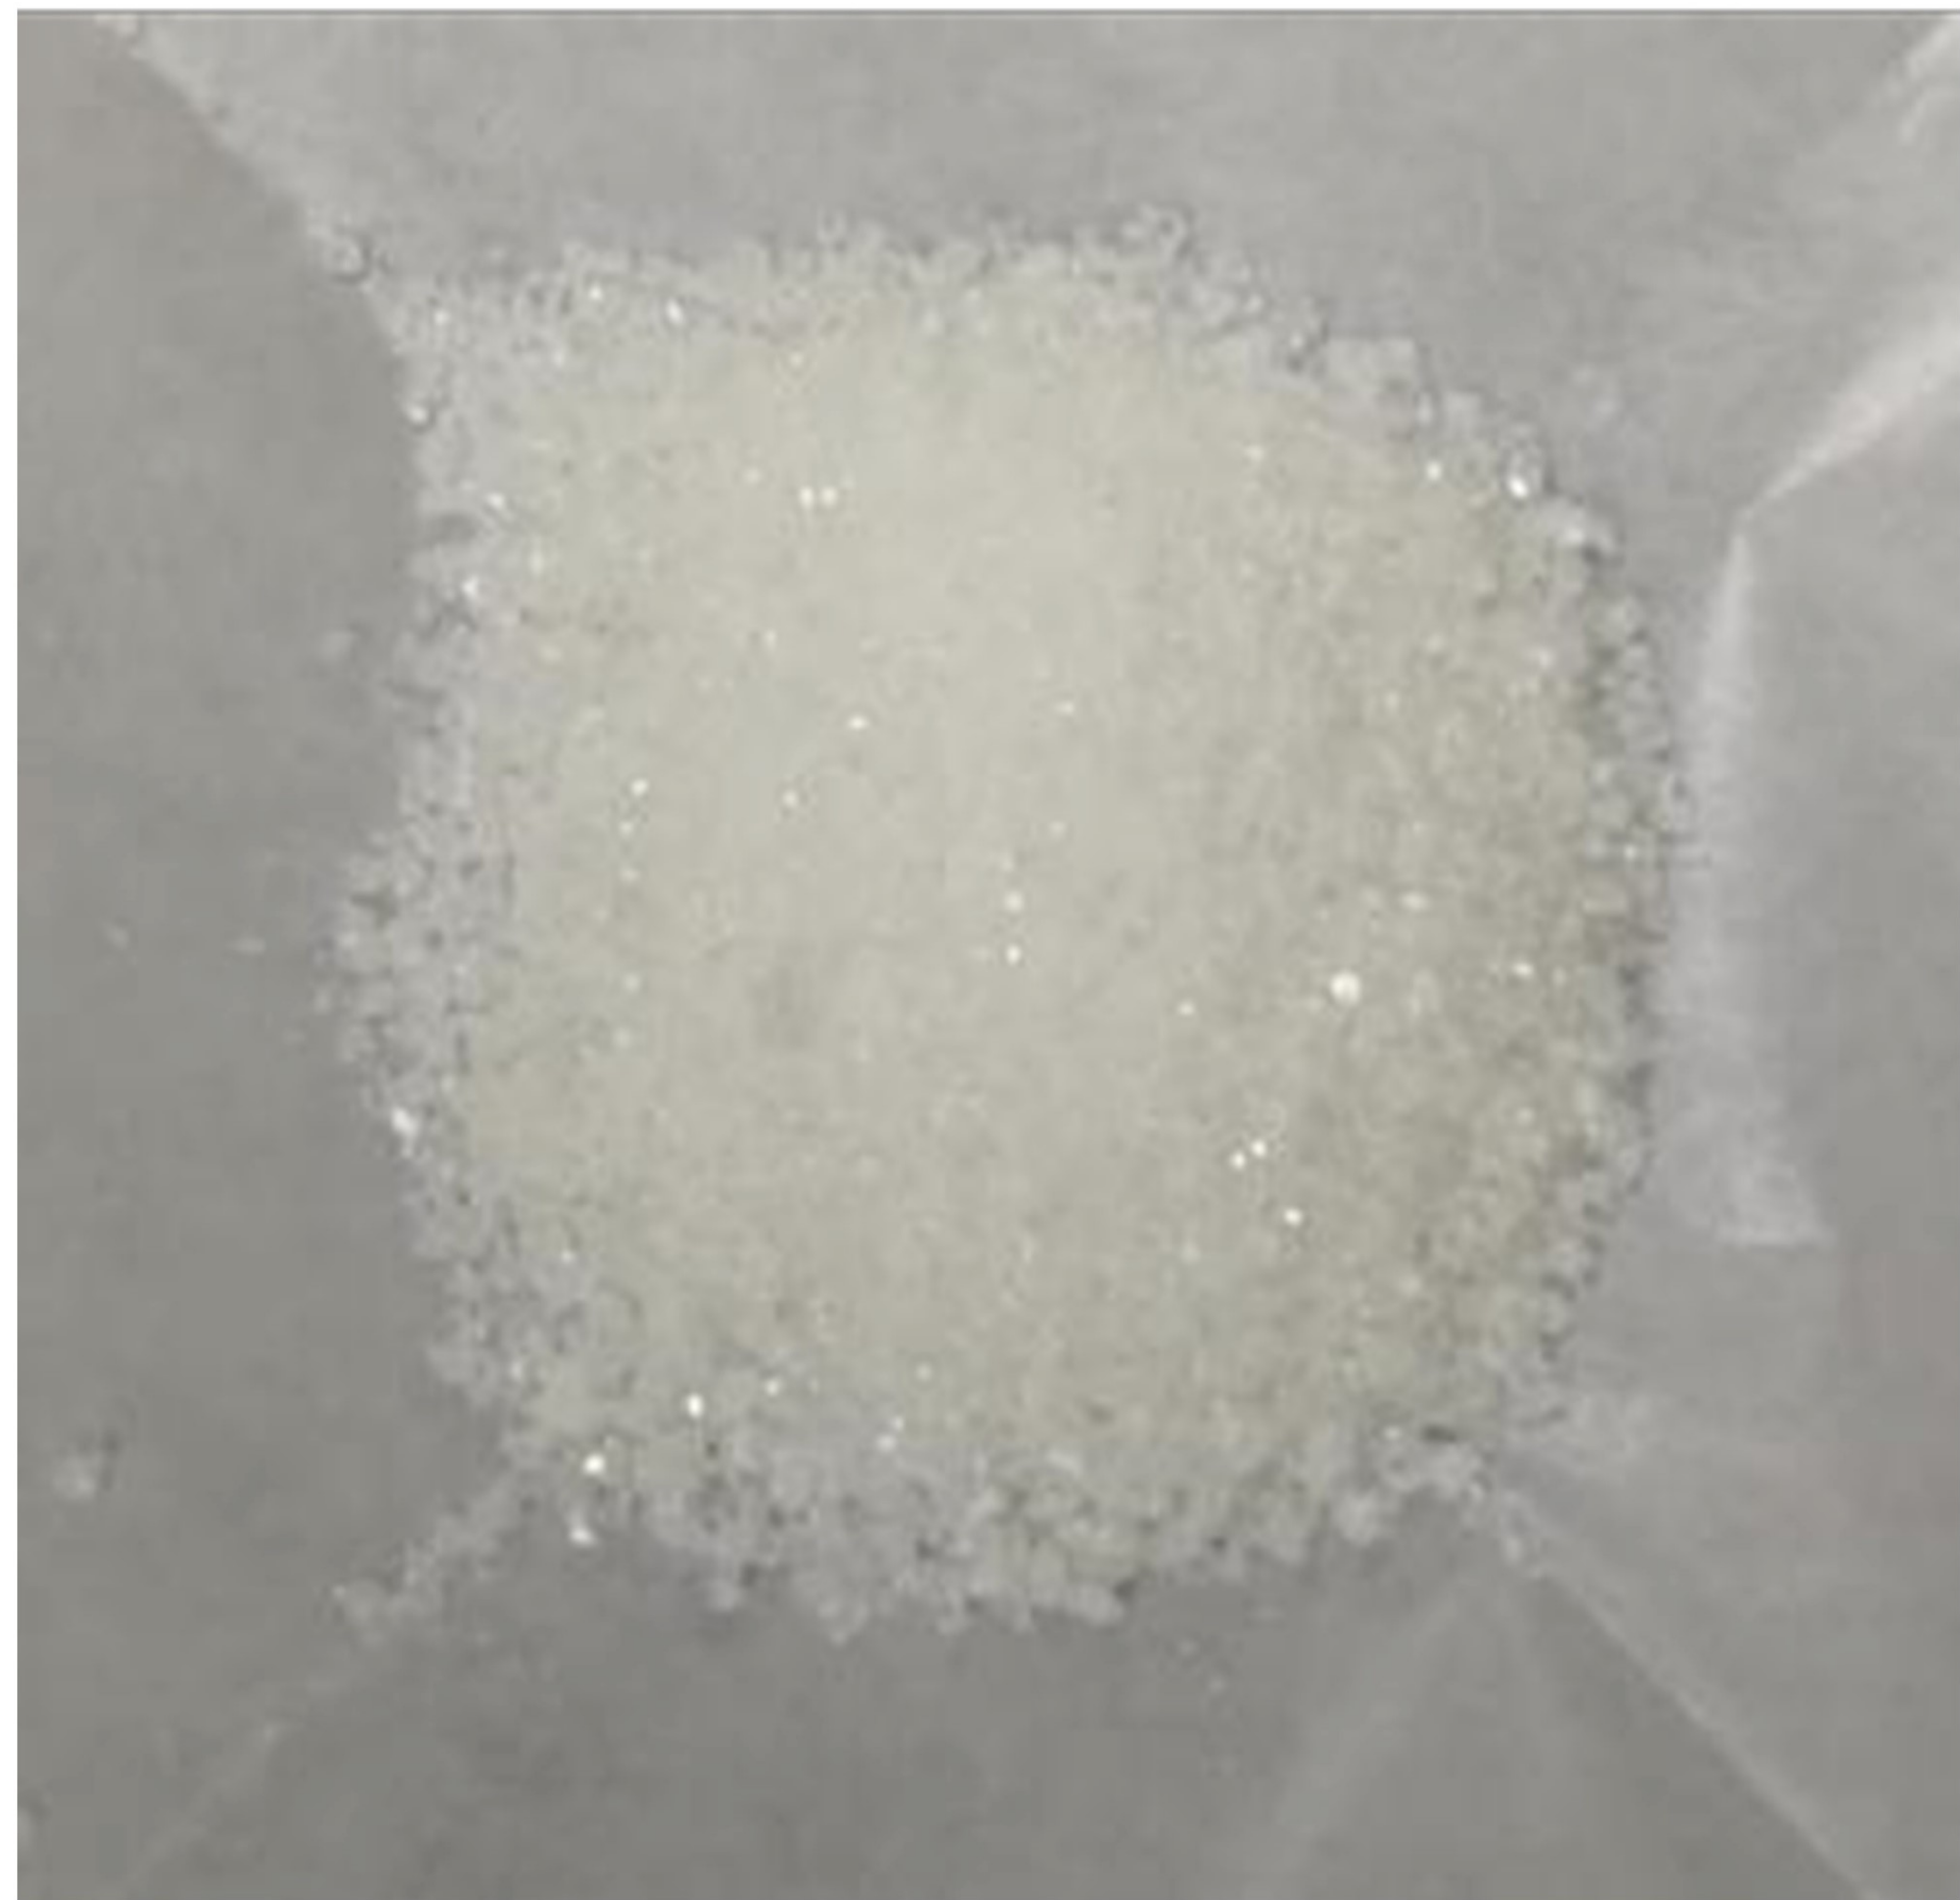

Supplement: d3cc02417b8.pdf [file d3cc02417b8.pdf]
